# Supplementary material for: Practical strategies for SARS-CoV-2 RT-PCR testing in resource-constrained settings
Source: bioRxiv or medRxiv preprint supplement (doi:10.1101/2021.02.18.21251999), 2021-03-04
Supplement: Supplementary file [file media-1.pdf]

## Supplementary Material

**Table S1:** Results of RT-qPCRs across nCoVPC plasmid control concentrations

| Target descriptive | Level concentrations (viral copies/uL) | Number of Positive Hit Counts | Total Test Counts |
|--------------------|----------------------------------------|-------------------------------|-------------------|
| N1                 | 100,000                                | 26                            | 26                |
| N1                 | 50,000                                 | 3                             | 3                 |
| N1                 | 20,000                                 | 33                            | 33                |
| N1                 | 2,000                                  | 33                            | 33                |
| N1                 | 200                                    | 33                            | 33                |
| N1                 | 20                                     | 33                            | 33                |
| N1                 | 10                                     | 20                            | 21                |
| N1                 | 2                                      | 11                            | 33                |
| N2                 | 100,000                                | 26                            | 26                |
| N2                 | 50,000                                 | 3                             | 3                 |
| N2                 | 20,000                                 | 33                            | 33                |
| N2                 | 2,000                                  | 33                            | 33                |
| N2                 | 200                                    | 33                            | 33                |
| N2                 | 20                                     | 33                            | 33                |
| N2                 | 10                                     | 18                            | 21                |
| N2                 | 2                                      | 17                            | 33                |

**Table S2: qRT-PCR results for pooled 3D-NMT swabs and concurrently collected individual flocked NMT swabs.** Pools, and their comprising individuals, are denoted by shaded rows. Individuals of the household who were not available for pooling are marked as not applicable. 24 pools and 106 individual swabs were collected.

| Family ID     | Subject ID | Ct value | Avg viral RNA copies/uL (NMT) | Pool result +/- | Ct Value of Pool | Average viral RNA copies/uL of pool | Family ID     | Subject ID | Ct value | Avg viral RNA copies/uL (NMT) | Pool result +/- | Ct Value of Pool | Average viral RNA copies/uL of pool |
|---------------|------------|----------|-------------------------------|-----------------|------------------|-------------------------------------|---------------|------------|----------|-------------------------------|-----------------|------------------|-------------------------------------|
| COV004<br>D21 | COV004     | undet    | 0                             | -               | undet            | 0                                   | COV030<br>D22 | COV030     | undet    | 0                             | indet           | 37               | 3                                   |
|               | COV004-001 | undet    | 0                             |                 |                  |                                     |               | COV030-001 | undet    | 0                             |                 |                  |                                     |
|               | COV004-002 | undet    | 0                             |                 |                  |                                     |               | COV030-002 | undet    | 0                             |                 |                  |                                     |
|               | COV004-004 | undet    | 0                             |                 |                  |                                     |               | COV030-003 | undet    | 0                             |                 |                  |                                     |
| COV012<br>D1  | COV012     | 29       | 2,439                         | +               | 23               | 54,917                              | COV032<br>D7  | COV032     | 32.5     | 66                            | -               | undet            | 0                                   |
|               | COV012-001 | 27       | 7,196                         |                 |                  |                                     |               | COV032-001 | undet    | 0                             |                 |                  |                                     |
|               | COV012-002 | 21.5     | 144,769                       |                 |                  |                                     |               | COV032-002 | undet    | 0                             |                 |                  |                                     |
|               | COV012-003 | 26       | 8,223                         |                 |                  |                                     |               | COV032-003 | undet    | 0                             |                 |                  |                                     |
|               | COV012-004 | 23.5     | 55,478                        |                 |                  |                                     |               | COV032     | 34       | 24                            |                 |                  |                                     |
| COV017<br>D1  | COV017     | 28       | 3,603                         | +               | 23               | 99,275                              | COV032<br>D21 | COV032-001 | undet    | 0                             | -               | undet            | 0                                   |
|               | COV017-001 | 23       | 135,846                       |                 |                  |                                     |               | COV032-002 | undet    | 0                             |                 |                  |                                     |
|               | COV017-002 | 30       | 518                           |                 |                  |                                     |               | COV032-003 | undet    | 0                             |                 |                  |                                     |
|               | COV017-003 | 22.5     | 162,938                       |                 |                  |                                     |               | COV033     | undet    | 0                             |                 |                  |                                     |
|               | COV017-004 | 21.5     | 481,149                       |                 |                  |                                     |               | COV033-001 | undet    | 0                             |                 |                  |                                     |
| COV020<br>D22 | COV020     | undet    | 0                             | indet           | 38.5             | 4                                   | COV033<br>D7  | COV033-002 | undet    | 0                             | -               | undet            | 0                                   |
|               | COV020-001 | undet    | 0                             |                 |                  |                                     |               | COV033-003 | undet    | 0                             |                 |                  |                                     |
|               | COV020-002 | undet    | 0                             |                 |                  |                                     |               | COV033-004 | undet    | 0                             |                 |                  |                                     |
|               | COV020-003 | undet    | 0                             |                 |                  |                                     |               | COV041     | undet    | 0                             |                 |                  |                                     |
|               | COV020-004 | 39.5     | 3                             |                 |                  |                                     |               | COV041-001 | 20       | 371,312                       |                 |                  |                                     |
| COV021<br>D14 | COV021     | undet    | 0                             | -               | undet            | 0                                   | COV041<br>D7  | COV041-002 | 36.5     | 4                             | +               | 24               | 28,967                              |
|               | COV021-001 | undet    | 0                             |                 |                  |                                     |               | COV041-003 | undet    | 0                             |                 |                  |                                     |
|               | COV021-002 | undet    | 0                             |                 |                  |                                     |               | COV041-004 | undet    | 0                             |                 |                  |                                     |
|               | COV021-003 | undet    | 0                             |                 |                  |                                     |               | COV041-005 | undet    | 0                             |                 |                  |                                     |
|               | COV021-004 | undet    | 0                             |                 |                  |                                     |               | COV045     | undet    | 0                             |                 |                  |                                     |
| COV021<br>D21 | COV021     | undet    | 0                             | -               | undet            | 0                                   | COV045<br>D7  | COV045-001 | undet    | 0                             | -               | undet            | 0                                   |
|               | COV021-001 | undet    | 0                             |                 |                  |                                     |               | COV045-002 | undet    | 0                             |                 |                  |                                     |
|               | COV021-002 | undet    | 0                             |                 |                  |                                     |               | COV045-003 | n/a      | n/a                           |                 |                  |                                     |
|               | COV021-003 | undet    | 0                             |                 |                  |                                     |               | COV049     | 32       | 607                           |                 |                  |                                     |
|               | COV021-004 | undet    | 0                             |                 |                  |                                     |               | COV049-001 | 27.5     | 59,704                        |                 |                  |                                     |
| COV026<br>D7  | COV026     | undet    | 0                             | -               | undet            | 0                                   | COV049<br>D7  | COV049-002 | 27.5     | 19,719                        | +               | 22               | 9,468                               |
|               | COV026-001 | undet    | 0                             |                 |                  |                                     |               | COV049-003 | 24.5     | 892,519                       |                 |                  |                                     |
|               | COV026-002 | undet    | 0                             |                 |                  |                                     |               | COV051     | undet    | 0                             |                 |                  |                                     |
|               | COV026-003 | undet    | 0                             |                 |                  |                                     |               | COV051-001 | undet    | 0                             |                 |                  |                                     |
|               | COV026-004 | undet    | 0                             |                 |                  |                                     |               | COV051-002 | undet    | 0                             |                 |                  |                                     |
| COV026<br>D14 | COV026     | undet    | 0                             | -               | undet            | 0                                   | COV051<br>D9  | COV051-003 | undet    | 0                             | -               | undet            | 0                                   |
|               | COV026-001 | undet    | 0                             |                 |                  |                                     |               | COV051-004 | undet    | 0                             |                 |                  |                                     |
|               | COV026-002 | undet    | 0                             |                 |                  |                                     |               | COV052     | 21       | 270,034                       |                 |                  |                                     |
|               | COV026-003 | undet    | 0                             |                 |                  |                                     |               | COV052-001 | undet    | 0                             |                 |                  |                                     |
|               | COV026-004 | undet    | 0                             |                 |                  |                                     |               | COV052-002 | undet    | 0                             |                 |                  |                                     |
| COV027<br>D7  | COV027     | 31       | 298                           | +               | 33.5             | 34                                  | COV052<br>D1  | COV052-003 | 34.5     | 22                            | +               | 21.5             | 152,869                             |
|               | COV027-001 | 35       | 24                            |                 |                  |                                     |               | COV052     | 33       | 69                            |                 |                  |                                     |
|               | COV027-002 | 35       | 21                            |                 |                  |                                     |               | COV052-001 | undet    | 0                             |                 |                  |                                     |
|               | COV027-003 | 35.5     | 16                            |                 |                  |                                     |               | COV052-002 | undet    | 0                             |                 |                  |                                     |
| COV027<br>D14 | COV027     | undet    | 0                             | indet           | 36               | 7                                   | COV052<br>D8  | COV052-003 | undet    | 0                             | +               | 34.5             | 14                                  |
|               | COV027-001 | 36.5     | 7                             |                 |                  |                                     |               | COV055     | undet    | 0                             |                 |                  |                                     |
|               | COV027-002 | 33.5     | 31                            |                 |                  |                                     |               | COV055-001 | 37.5     | 9                             |                 |                  |                                     |
|               | COV027-003 | undet    | 0                             |                 |                  |                                     |               | COV055-002 | 28       | 3,800                         |                 |                  |                                     |
| COV029<br>D8  | COV029     | undet    | 0                             | +               | 31.5             | 131                                 | COV055<br>D8  | COV055-005 | n/a      | n/a                           | +               | 27               | 6,152                               |
|               | COV029-001 | 38       | 5                             |                 |                  |                                     |               | COV059     | undet    | 0                             |                 |                  |                                     |
|               | COV029-002 | 35       | 29                            |                 |                  |                                     |               | COV059-001 | 27       | 8,367                         |                 |                  |                                     |
|               | COV029-003 | 22       | 134,705                       |                 |                  |                                     |               | COV059-002 | undet    | 0                             |                 |                  |                                     |
| COV030<br>D8  | COV030     | 29       | 1532                          | +               | 28.5             | 2183                                | COV059<br>D8  | COV059-003 | undet    | 0                             | +               | 27               | 6,417                               |
|               | COV030-001 | undet    | 0                             |                 |                  |                                     |               | COV059-004 | undet    | 0                             |                 |                  |                                     |
|               | COV030-002 | 28       | 2767                          |                 |                  |                                     |               |            |          |                               |                 |                  |                                     |
|               | COV030-003 | 37.5     | 5                             |                 |                  |                                     |               |            |          |                               |                 |                  |                                     |

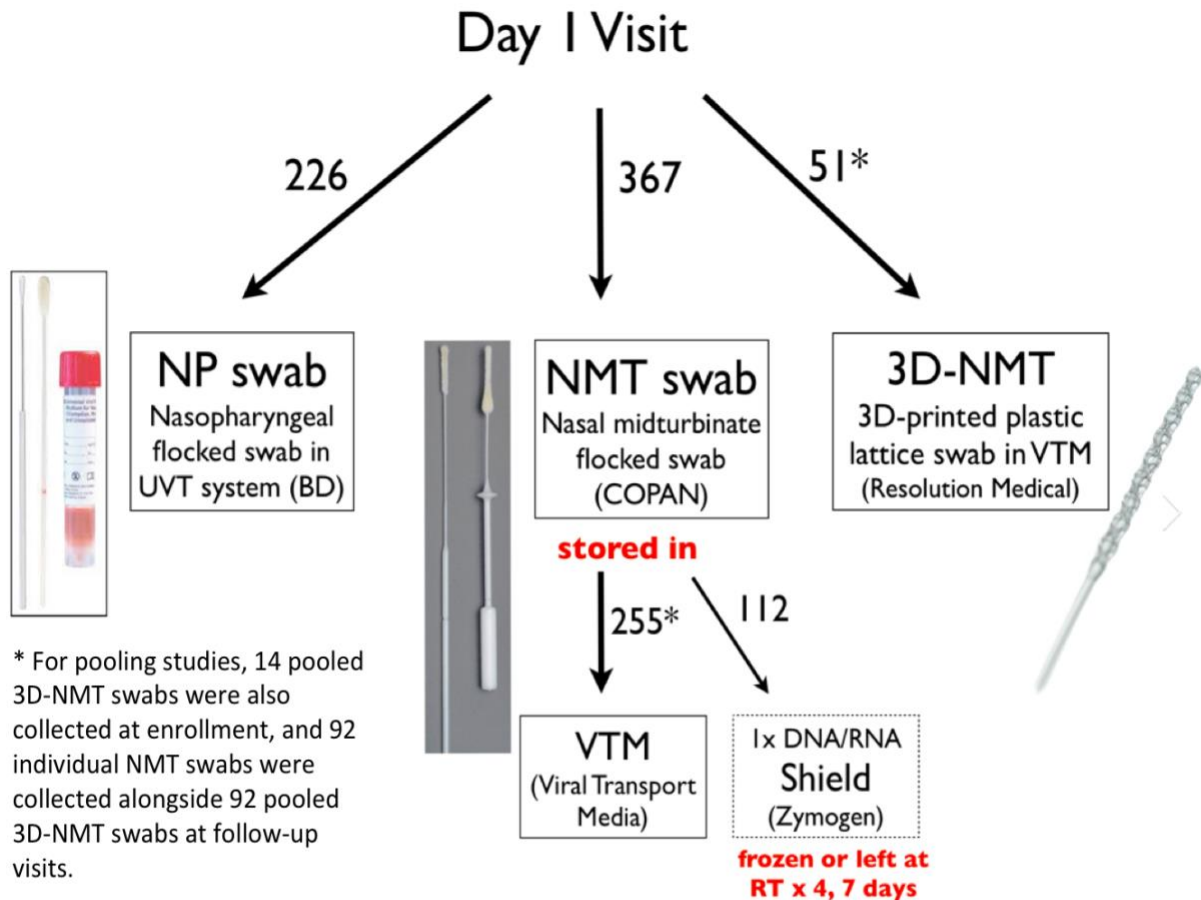

**Figure S1. Schematic of swab collection strategies at enrollment.** For each study participant at enrollment, a nasopharyngeal (NP) swab was collected as the gold standard diagnostic test. Up to 2 nasal midturbinate swabs - flocced COPAN swabs (NMT) and/or 3D-printed plastic lattice swabs (3D-NMT) - were concurrently collected, one from each nostril, for comparison. 3D-printed swabs were autoclaved before use per manufacturer's instructions

Swabs were either stored in viral transport media (VTM) or 1x DNA/RNA Shield (1xShield). Samples stored in 1xShield were further analyzed via aliquots that were either immediately frozen (D1 Shield) or left out at room temperature for 4 or 7 days (D4 Shield, D7 Shield) before storage at -80°C. A total of 620 individual swabs were collected at enrollment, while 184 swabs were collected to test pooling at follow-up visits.

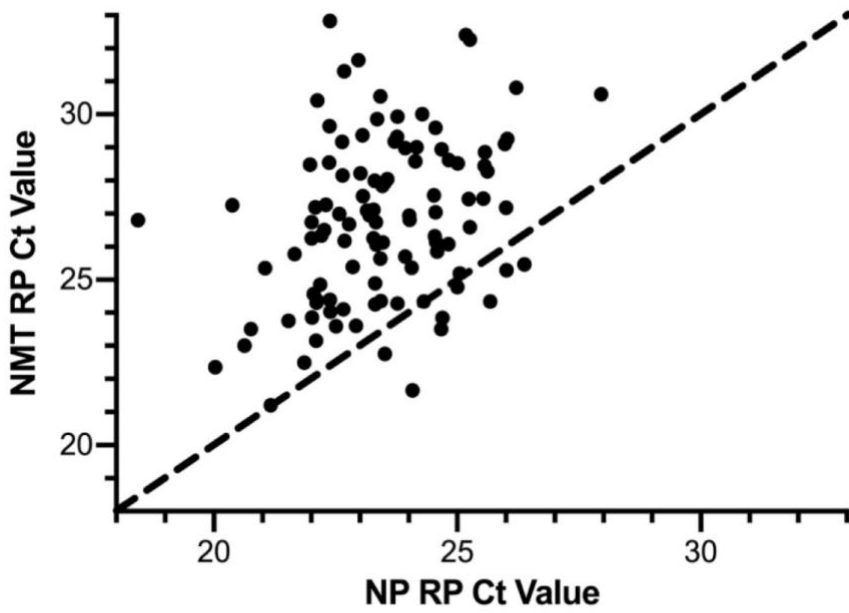

**Figure S2. Comparison of human RPP30 gene (RP) cycle threshold (Ct) values from paired nasopharyngeal (NP) and nasal mid-turbinate (NMT) swabs.** Higher RP Ct values were observed in NMT swabs compared to NP swabs with an average Ct value difference of 3.1 cycles, suggesting better sampling. A  $y=x$  line is drawn for reference.
